# Supplementary material for: Optimizing plant growth, nutrient uptake, and yield of onion through the application of phosphorus solubilizing bacteria and endophytic fungi
Source: Front Microbiol. 2024 Jul 25;15:1442912. doi: 10.3389/fmicb.2024.1442912 (PMC11306034; doi:10.3389/fmicb.2024.1442912)
Supplement: Supplementary file 1 [file Table_1.XLSX]

## Sheet: Sheet1
Week No	Date	Maximum temperature (°C)	Minimum temperature (°C)	Relative Humadity 8.45 A M	Relative Humadity 2.45 P M	Velocity (mm )	Sunshine hour	Rain (mm)	Evaporation(mm)
	Weather data for 2018-2019
40	01-10-2018	34.20	16.20	87.00	71.00	3.80	6.30	40.60	1.00
	02-10-2018	36.20	18.70	83.00	69.00	3.30	7.15	7.40	1.30
	03-10-2018	34.20	16.20	95.00	66.00	1.60	9.20	62.00	0.80
	04-10-2018	34.70	19.20	84.00	78.00	4.00	9.30	0.00	1.70
	05-10-2018	34.20	20.20	94.00	70.00	3.50	8.40	0.00	2.50
	06-10-2018	32.70	17.70	70.00	59.00	4.60	8.50	0.00	2.90
	07-10-2018	35.20	18.70	83.00	69.00	4.80	8.40	0.00	3.60
41	08-10-2018	34.20	17.20	77.00	66.00	3.50	8.40	0.00	3.50
	09-10-2018	35.20	20.20	84.00	67.00	2.00	9.00	0.00	3.40
	10-10-2018	34.20	16.20	80.00	42.00	2.80	8.30	0.00	3.60
	11-10-2018	34.20	16.20	78.00	55.00	3.70	7.40	0.00	4.10
	12-10-2018	35.20	16.70	79.00	52.00	2.50	5.50	0.00	3.40
	13-10-2018	34.20	16.20	79.00	50.00	3.10	7.50	0.00	3.50
	14-10-2018	34.20	17.20	76.00	56.00	2.50	8.10	0.00	3.30
42	15-10-2018	34.20	15.70	76.00	48.00	2.20	8.30	0.00	3.60
	16-10-2018	34.20	15.20	71.00	50.00	1.90	7.50	0.00	3.70
	17-10-2018	34.20	16.20	86.00	53.00	4.40	8.00	0.00	3.60
	18-10-2018	34.70	19.70	86.00	60.00	9.00	9.00	0.00	3.60
	19-10-2018	35.20	20.20	84.00	67.00	2.70	8.00	0.00	3.00
	20-10-2018	35.20	19.20	87.00	64.00	2.50	9.40	0.00	3.60
	21-10-2018	35.20	19.20	82.00	69.00	2.80	9.30	0.00	3.60
43	22-10-2018	34.20	16.70	72.00	65.00	2.10	9.00	0.00	4.10
	23-10-2018	34.70	15.70	83.00	49.00	3.10	10.05	0.00	3.70
	24-10-2018	35.20	13.20	71.00	65.00	2.60	8.00	0.00	3.30
	25-10-2018	35.20	15.20	68.00	60.00	4.30	8.30	0.00	3.70
	26-10-2018	33.20	12.70	77.00	60.00	3.80	9.55	0.00	3.70
	27-10-2018	34.20	13.70	78.00	61.00	3.40	9.50	0.00	3.90
	28-10-2018	34.70	15.70	79.00	60.00	4.50	9.30	0.00	3.80
44	29-10-2018	34.70	12.20	77.00	66.00	2.80	10.50	0.00	3.70
	30-10-2018	31.70	12.70	64.00	48.00	3.50	10.00	0.00	3.80
	31-10-2018	31.20	12.20	66.00	60.00	4.90	10.00	0.00	3.20
	01-11-2018	32.20	13.20	71.00	62.00	4.10	8.55	0.00	3.40
	02-11-2018	31.20	16.20	73.00	57.00	2.90	8.55	0.00	3.40
	03-11-2018	32.20	12.20	69.00	63.00	4.00	10.00	0.00	2.30
	04-11-2018	33.20	12.20	80.00	64.00	3.40	10.00	0.00	3.50
45	05-11-2018	33.20	18.70	90.00	69.00	2.40	9.40	0.00	2.90
	06-11-2018	31.20	16.20	70.00	70.00	3.40	10.40	0.00	3.80
	07-11-2018	33.20	14.20	94.00	66.00	2.30	10.40	0.00	3.70
	08-11-2018	33.70	13.20	72.00	61.00	1.80	9.40	0.00	3.50
	09-11-2018	34.20	14.20	75.00	67.00	1.20	10.40	0.00	3.20
	10-11-2018	34.20	16.20	71.00	66.00	3.60	10.40	0.00	3.90
	11-11-2018	33.20	12.20	72.00	64.00	2.30	9.15	0.00	3.70
46	12-11-2018	32.70	12.20	80.00	58.00	2.50	9.55	0.00	3.40
	13-11-2018	32.20	10.20	71.00	60.00	2.10	9.10	0.00	2.90
	14-11-2018	32.20	11.20	80.00	58.00	2.20	9.55	0.00	2.30
	15-11-2018	32.70	11.70	69.00	60.00	3.60	10.55	0.00	2.50
	16-11-2018	32.00	11.20	72.00	58.00	2.50	10.55	0.00	2.40
	17-11-2018	32.70	13.20	64.00	60.00	1.70	9.55	0.00	3.20
	18-11-2018	33.70	13.20	73.00	62.00	2.40	10.55	0.00	3.50
47	19-11-2018	33.70	13.20	75.00	72.00	4.30	5.50	0.00	3.80
	20-11-2018	31.20	18.20	79.00	70.00	6.90	9.30	0.00	4.00
	21-11-2018	32.20	15.20	76.00	52.00	2.80	8.40	0.00	4.00
	22-11-2018	31.70	15.20	67.00	51.00	1.30	8.55	0.00	3.70
	23-11-2018	12.20	0.00	56.00	56.00	6.50	9.55	0.00	3.60
	24-11-2018	32.70	12.40	66.00	65.00	4.50	9.55	0.00	2.90
	25-11-2018	31.70	14.20	80.00	58.00	2.20	8.50	0.00	3.20
48	26-11-2018	31.70	11.20	81.00	46.00	2.10	9.00	0.00	3.10
	27-11-2018	30.70	9.20	63.00	50.00	3.60	8.40	0.00	2.70
	28-11-2018	30.20	9.20	72.00	56.00	3.30	9.00	0.00	3.00
	29-11-2018	29.20	10.20	76.00	49.00	3.10	9.40	0.00	2.20
	30-11-2018	30.20	9.70	74.00	56.00	2.50	8.50	0.00	3.10
	01-12-2018	30.20	9.70	75.00	56.00	2.50	8.50	0.00	3.80
	02-12-2018	29.20	10.20	80.00	49.00	1.30	9.00	0.00	3.90
49	03-12-2018	29.20	11.20	71.00	55.00	2.40	9.00	0.00	3.70
	04-12-2018	29.20	12.20	77.00	63.00	2.50	4.00	0.00	3.50
	05-12-2018	29.70	12.70	82.00	64.00	1.60	8.30	0.00	2.80
	06-12-2018	30.70	11.20	77.00	70.00	2.00	9.00	0.00	3.20
	07-12-2018	32.20	12.20	79.00	51.00	2.40	9.00	0.00	3.30
	08-12-2018	32.20	10.70	68.00	55.00	3.10	0.00	0.00	2.90
	09-12-2018	32.20	10.70	68.00	55.00	3.10	0.00	0.00	2.90
50	10-12-2018	32.20	8.70	68.00	47.00	3.40	10.00	0.00	3.30
	11-12-2018	30.70	8.70	73.00	47.00	1.40	9.50	0.00	2.50
	12-12-2018	29.20	5.20	58.00	57.00	2.80	9.00	0.00	2.40
	13-12-2018	27.30	21.20	62.00	56.00	3.90	9.00	0.00	2.00
	14-12-2018	28.20	10.20	55.00	60.00	1.70	9.40	0.00	2.00
	15-12-2018	29.20	9.20	65.00	58.00	4.30	9.50	0.00	2.60
	16-12-2018	30.30	5.20	64.00	60.00	0.00	0.00	0.00	1.90
51	17-12-2018	28.20	5.70	59.00	52.00	2.80	9.00	0.00	2.00
	18-12-2018	29.20	9.20	71.00	62.00	2.50	9.00	0.00	1.60
	19-12-2018	27.70	7.20	77.00	53.00	2.40	9.10	0.00	1.80
	20-12-2018	26.70	4.70	61.00	59.00	3.20	9.40	0.00	2.00
	21-12-2018	27.70	8.20	78.00	59.00	2.30	9.15	0.00	2.30
	22-12-2018	29.20	9.20	74.00	61.00	2.90	10.10	0.00	2.80
	23-12-2018	29.70	11.20	68.00	47.00	2.90	9.50	0.00	3.10
52	24-12-2018	28.20	10.20	77.00	63.00	3.10	9.15	0.00	3.10
	25-12-2018	29.70	12.20	79.00	51.00	2.00	6.40	0.00	2.90
	26-12-2018	30.20	9.20	64.00	60.00	3.70	7.50	0.00	3.40
	27-12-2018	31.70	5.20	59.00	45.00	3.10	8.50	0.00	3.00
	28-12-2018	26.20	5.20	66.00	54.00	2.50	9.50	0.00	3.70
	29-12-2018	25.20	9.20	70.00	46.00	1.80	9.30	0.00	4.80
	30-12-2018	25.20	9.20	75.00	52.00	2.90	9.45	0.00	3.90
	31-12-2018	26.70	3.20	81.00	52.00	2.90	7.00	0.00	3.90
1	01-01-2019	26.7	5.7	65	58	2.2	9.5	0	3.9
	02-01-2019	30.70	6.20	71.00	48.00	1.10	9.40	0.00	3.70
	03-01-2019	31.20	6.20	78.00	17.00	1.00	9.30	0.00	4.10
	04-01-2019	31.20	6.20	72.00	56.00	1.80	9.30	0.00	3.00
	05-01-2019	31.70	6.70	76.00	61.00	1.70	9.10	0.00	3.10
	2019-01-06	31.20	8.20	75.00	61.00	1.60	9.30	0.00	3.90
	2019-01-07	30.70	7.20	69.00	43.00	2.00	9.20	0	3.90
2	08-01-2019	28.20	5.70	75.00	47.00	9.00	9.00	0.00	2.80
	2019-01-09	30.20	6.50	82.00	44.00	1.10	8.40	0.00	3.30
	10-01-2019	30.70	6.50	78.00	70.00	1.80	8.50	0.00	4.40
	11-01-2019	28.70	9.20	83.00	51.00	2.00	9.00	0.00	3.60
	12-01-2019	27.70	9.20	71.00	48.00	1.80	9.00	0	3.40
	13-01-2019	30.20	11.20	69.00	43.00	2.40	9.10	0.00	3.40
	14-01-2019	29.70	14.20	67.00	44.00	2.50	8.10	0.00	3.10
3	15-01-2019	30.70	10.70	79.00	46.00	1.40	8.40	0.00	3.20
	16-01-2019	31.20	8.70	80.00	52.00	1.50	9.00	0.00	3.50
	17-01-2019	30.70	9.20	72.00	61.00	1.10	9.40	0.00	3.50
	2019-01-18	31.20	7.70	72.00	48.00	2.00	9.20	0.00	3.90
	19-01-2019	31.70	8.70	68.00	62.00	2.50	9.00	0.00	4.10
	2019-01-20	29.70	9.70	83.00	49.00	2.60	9.25	0.00	3.90
	21-01-2019	31.20	10.20	80.00	36.00	3.10	9.40	0.00	3.80
4	22-01-2019	31.20	5.70	59.00	48.00	4.40	9.30	0.00	3.70
	23-01-2019	28.60	6.70	84.00	53.00	3.50	9.35	0.00	3.80
	24-01-2019	28.70	7.20	83.00	50.00	4.20	9.40	0.00	3.30
	25-01-2019	29.20	4.20	73.00	44.00	2.50	9.00	0.00	3.70
	26-01-2019	31.20	6.70	78.00	56.00	8.90	5.00	0.00	3.70
	2019-01-27	25.70	6.20	84.00	49.00	5.20	9.25	0.00	3.20
	28-01-2019	27.20	9.20	75.00	62.00	3.80	4.40	0.00	3.20
5	29-01-2019	28.70	5.20	78.00	56.00	4.10	9.50	0.00	2.70
	30-01-2019	28.20	4.70	71.00	56.00	1.20	9.25	0.00	3.40
	01-02-2019	28.70	9.20	80.00	57.00	1.80	8.30	0.00	2.90
	02-02-2019	30.70	9.70	90.00	53.00	2.20	9.00	0.00	2.40
	03-02-2019	29.70	8.70	79.00	39.00	2.30	8.40	0.00	3.00
	04-02-2019	30.20	10.70	73.00	42.00	4.60	8.35	0.00	3.60
6	05-02-2019	29.70	11.20	80.00	53.00	2.00	7.20	0.00	3.00
	2019-02-06	31.20	10.20	90.00	41.00	5.00	10.10	0.00	4.30
	07-02-2019	31.70	5.70	58.00	52.00	7.40	9.45	0.00	3.80
	2019-02-08	26.70	5.70	83.00	42.00	2.20	10.00	0.00	3.60
	09-02-2019	29.20	8.70	84.00	39.00	2.20	9.00	0.00	3.80
	10-02-2019	31.20	10.20	78.00	56.00	1.60	10.50	0.00	4.30
	11-02-2019	27.70	9.20	75.00	62.00	4.80	9.50	0.00	3.80
7	12-02-2019	33.70	10.20	65.00	58.00	1.70	7.35	0.00	3.70
	13-02-2019	32.70	13.20	86.00	57.00	2.30	8.35	0.00	4.10
	14-02-2019	32.70	11.20	77.00	45.00	3.50	9.35	0.00	3.80
	2019-02-15	33.20	9.20	63.00	58.00	2.70	9.30	0.00	3.80
	16-02-2019	33.70	10.70	68.00	57.00	4.00	9.00	0.00	4.50
	2019-02-17	33.20	13.20	73.00	62.00	3.40	10.20	0.00	4.40
	18-02-2019	32.20	6.70	69.00	58.00	2.00	9.50	0.00	4.60
8	19-02-2019	34.20	10.20	78.00	51.00	1.90	9.50	0.00	3.60
	20-02-2019	35.20	11.70	68.00	50.00	3.10	9.10	0.00	4.20
	21-02-2019	36.20	14.20	72.00	45.00	2.00	7.20	0.00	4.60
	22-02-2019	35.70	14.70	78.00	41.00	2.60	9.20	0.00	4.20
	23-02-2019	35.70	12.20	66.00	49.00	2.60	10.20	0.00	4.30
	24-02-2019	35.70	9.70	68.00	58.00	5.00	10.30	0.00	4.40
	2019-02-25	35.70	11.20	56.00	35.00	6.10	10.20	0.00	4.50
9	26-02-2019	33.20	9.20	60.00	38.00	6.20	9.50	0.00	3.80
	27-02-2019	30.70	8.70	63.00	38.00	6.60	10.00	0.00	4.20
	2019-02-28	29.70	6.20	74.00	45.00	1.80	10.25	0.00	4.90
	01-03-2019	31.2	6.7	62.00	46.00	1.90	10.10	0.00	4.40
	02-03-2019	36.20	10.20	71.00	40.00	4.90	8.10	0.00	4.20
	2019-03-03	33.70	9.70	58.00	36.00	5.80	8.40	0.00	4.50
10	05-03-2019	31.70	10.20	76.00	46.00	5.00	9.00	0.00	4.80
	06-03-2019	31.20	12.20	68.00	48.00	3.80	9.10	0.00	4.60
	07-03-2019	21.20	11.20	67.00	41.00	2.50	9.00	0.00	4.50
	08-03-2019	33.70	13.70	68.00	48.00	4.00	8.10	0.00	4.10
	09-03-2019	34.20	15.20	81.00	41.00	2.90	6.30	0.00	4.40
	10-03-2019	33.70	14.70	77.00	48.00	3.60	9.00	0.00	4.90
	2019-03-11	35.20	16.20	78.00	51.00	4.20	8.00	0.00	5.10
11	12-03-2019	34.20	16.20	82.00	43.00	6.90	7.40	0.00	4.80
	13-03-2019	35.70	15.70	70.00	46.00	4.70	6.20	0.00	4.60
	14-03-2019	34.20	14.20	57.00	44.00	3.80	8.30	0.00	5.40
	15-03-2019	34.20	13.70	61.00	47.00	2.80	8.50	0.00	4.40
	16-03-2019	35.70	14.20	57.00	48.00	2.50	9.00	0.00	5.10
	17-03-2019	33.70	15.50	76.00	51.00	4.30	9.00	0.00	4.80
	18-03-2019	36.20	17.20	78.00	41.00	3.60	9.30	0.00	5.50
12	19-03-2019	35.20	18.70	82.00	46.00	4.70	9.50	0.00	5.10
	2019-03-20	34.70	16.70	57.00	44.00	4.30	9.30	0.00	4.80
	21-03-2019	36.20	14.20	48.00	38.00	4.80	8.40	0.00	5.00
	2019-03-22	35.70	12.20	52.00	37.00	2.60	9.00	0.00	5.00
	23-03-2019	36.20	14.20	36.00	37.00	2.00	9.00	0.00	4.90
	24-03-2019	37.20	15.20	47.00	39.00	1.40	8.30	0.00	4.90
	25-03-2019	38.20	16.70	59.00	43.00	2.80	7.40	0.00	4.60
13	26-03-2019	39.20	16.20	46.00	47.00	2.40	8.40	0.00	5.20
	27-03-2019	39.20	16.20	58.00	46.00	1.30	9.00	0.00	5.60
	28-03-2019	40.20	17.20	69.00	45.00	2.80	9.00	0.00	5.10
	29-03-2019	39.20	16.70	76.00	44.00	3.30	8.50	0.00	5.30
	2019-03-30	39.70	15.70	59.00	47.00	4.20	7.50	0.00	5.80
	31-03-2019	40.70	16.20	69.00	48.00	5.20	8.30	0.00	6.10
	2019-04-01	38.70	15.20	52.00	39.00	4.20	9.20	0.00	5.60
14	02-04-2019	38.70	13.70	59.00	44.00	3.70	9.10	0.00	5.60
	03-04-2019	37.9	15.7	61	48	4.2	9.4	0	5.4
	04-04-2019	19.70	0.00	59.00	41.00	4.90	9.50	0.00	5.50
	2019-04-05	40.20	19.70	60.00	52.00	5.40	8.00	0.00	5.50
	06-04-2019	38.20	17.20	56.00	46.00	5.40	8.20	0.00	5.20
	07-04-2019	39.20	16.20	46.00	42.00	6.10	9.00	0.00	6.10
	08-04-2019	38.70	16.20	54.00	40.00	5.00	8.50	0.00	6.50
15	09-04-2019	39.70	16.20	54.00	43.00	5.30	8.40	0.00	6.20
	10-04-2019	37.70	15.20	56.00	50.00	4.38	9.20	0.00	6.20
	11-04-2019	39.70	16.70	64.00	40.00	4.50	8.00	0.00	6.50
	12-04-2019	40.20	17.70	66.00	52.00	4.20	8.30	0.00	6.40
	2019-04-13	40.20	19.70	60.00	50.00	3.90	7.15	0.00	6.40
	14-04-2019	39.20	19.70	70.00	40.00	3.50	7.15	8.80	4.50
	15-04-2019	39.20	20.20	87.00	44.00	3.50	8.00	0.00	6.00
16	16-04-2019	38.70	21.20	75.00	60.00	2.00	11.10	0.00	6.30
	17-04-2019	37.20	14.20	67.00	50.00	8.20	10.10	6.00	7.80
	18-04-2019	35.70	14.70	56.00	53.00	2.80	11.40	0.00	5.80
	19-04-2019	37.70	15.20	81.00	50.00	3.80	11.00	0.00	5.90
	20-04-2019	34.20	14.20	58.00	50.00	6.20	11.10	0.00	6.10
	21-04-2019	36.40	15.20	59.00	54.00	5.90	11.00	0.00	6.00
	22-04-2019	35.10	14.70	58.00	58.00	5.20	10.50	0.00	6.10
17	23-04-2019	38.60	16.20	80.00	33.00	3.80	11.10	0.00	6.60
	24-04-2019	39.70	18.20	53.00	32.00	4.50	9.25	0.00	6.40
	25-04-2019	40.80	18.20	69.00	32.00	4.30	9.40	0.00	6.40
	26-04-2019	40.20	18.70	63.00	28.00	5.30	10.20	0.00	6.70
	27-04-2019	41.70	18.70	52.00	29.00	6.20	10.00	0.00	6.60
	28-04-2019	42.20	20.20	61.00	34.00	6.00	11.30	0.00	6.60
	29-04-2019	42.20	20.20	58.00	34.00	6.60	11.10	0.00	6.60
18	2019-04-30	42.20	20.70	54.00	44.00	6.00	10.20	0.00	6.80
	01-05-2019	33.70	18.70	59.00	47.00	8.90	10.40	0.00	6.40
	02-05-2019	36.70	18.20	60.00	49.00	7.40	11.50	0.00	6.60
	03-05-2019	35.70	15.20	57.00	59.00	9.30	11.10	0.00	5.90
	2019-05-04	36.20	15.70	69.00	55.00	7.30	11.10	0.00	5.90
	05-05-2019	35.20	19.20	73.00	48.00	6.60	11.05	0.00	5.30
	06-05-2019	37.20	17.70	77.00	41.00	4.60	10.40	0.00	5.60
19	07-05-2019	39.20	19.20	78.00	50.00	9.80	10.40	0.00	6.40
	2019-05-08	38.70	21.70	77.00	56.00	9.20	11.00	0.00	5.20
	09-05-2019	36.20	21.70	66.00	60.00	8.50	11.20	0.00	6.20
	10-05-2019	35.70	19.20	70.00	60.00	8.10	11.25	0.00	6.80
	11-05-2019	35.20	20.20	76.00	48.00	6.90	11.40	0.00	5.60
	2019-05-12	38.20	21.20	67.00	50.00	7.00	11.20	0.00	6.60
	13-05-2019	39.70	20.70	73.00	45.00	0.00	0.00	0.00	6.60
	2019-05-14	39.70	21.70	77.00	43.00	0.00	0.00	0.00	6.30
20	15-05-2019	37.70	20.20	85.00	50.00	6.80	11.15	0.00	6.10
	16-05-2019	37.70	20.20	85.00	50.00	6.80	11.15	0.00	6.10
	17-05-2019	38.20	17.20	54.00	53.00	4.00	11.00	0.00	6.50
	18-05-2019	39.70	22.20	68.00	28.00	6.50	11.00	0.00	6.20
	19-05-2019	39.70	22.20	73.00	47.00	8.90	11.20	0.00	6.20
	20-05-2019	40.20	40.20	71.00	30.00	7.80	11.00	0.00	6.70
21	21-05-2019	42.20	19.70	53.00	42.00	6.00	11.20	0.00	7.00
	22-05-2019	40.20	21.70	67.00	30.00	8.10	11.30	0.00	6.50
	23-05-2019	40.20	22.20	72.00	56.00	7.30	11.00	0.00	6.90
	24-05-2019	39.90	22.70	70.00	56.00	7.30	11.20	0.00	6.70
	25-05-2019	39.70	22.70	68.00	49.00	9.00	11.00	0.00	6.30
	26-05-2019	39.70	19.20	71.00	31.00	10.20	11.20	0.00	6.30
22	27-05-2019	39.70	22.70	57.00	52.00	10.10	11.30	0.00	6.60
	28-05-2019	39.20	20.70	60.00	50.00	9.60	11.20	0.00	6.00
	30-05-2019	39.70	20.70	68.00	55.00	10.80	10.50	0.00	5.60
	31-05-2019	40.20	23.20	81.00	58.00	8.00	10.50	0.00	5.20
	Weather data for 2019-2020
40	01-10-2019	29.70	19.70	82.00	68.00	4.60	9.00	0.00	2.80
	02-10-2019	30.70	18.70	82.00	75.00	3.80	9.20	0.00	2.80
	03-10-2019	31.20	18.20	82.00	63.00	1.00	4.25	0.00	2.80
	2019-10-04	31.70	20.70	87.00	74.00	2.10	3.50	0.00	2.30
	05-10-2019	30.20	19.20	90.00	70.00	1.10	8.10	11.80	1.10
	06-10-2019	31.70	20.20	87.00	63.00	3.20	4.00	0.00	2.30
	07-10-2019	31.20	19.70	87.00	69.00	1.60	7.30	0.00	1.90
41	08-10-2019	31.20	19.20	92.00	69.00	2.60	5.00	0.00	1.40
	09-10-2019	31.20	20.20	87.00	71.00	2.40	7.30	18.00	0.90
	10-10-2019	31.00	20.70	92.00	69.00	3.40	5.50	0.00	1.50
	12-10-2019	30.12	21.20	84.00	54.00	2.20	6.30	0.00	1.40
	13-10-2019	31.20	21.20	84.00	69.00	2.50	7.05	0.00	1.50
	14-10-2019	32.20	21.70	83.00	66.00	3.00	5.45	0.00	2.20
42	15-10-2019	32.20	19.70	73.00	52.00	5.50	9.20	0.00	2.50
	16-10-2019	32.70	20.70	86.00	52.00	2.90	8.10	0.00	2.60
	17-10-2019	31.20	18.20	86.00	65.00	2.60	6.50	0.00	2.50
	17-10-2019	31.20	18.20	86.00	65.00	2.60	6.50	0.00	2.50
	18-10-2019	28.70	20.20	87.00	92.00	5.40	0.30	0.00	2.90
	19-10-2019	24.70	18.70	95.00	90.00	4.40	0.00	9.20	1.40
	20-10-2019	25.20	19.20	95.00	87.00	4.30	5.20	22.20	0.40
	21-10-2019	28.20	19.70	91.00	69.00	2.70	0.00	10.00	0.40
43	22-10-2019	28.20	18.70	95.00	81.00	2.40	3.20	28.00	0.50
	23-10-2019	28.20	20.20	95.00	83.00	1.80	3.00	27.40	0.30
	24-10-2019	27.20	21.20	90.00	83.00	4.30	2.20	1.60	0.80
	25-10-2019	25.20	20.70	85.00	12.60	11.00	2.20	1.60	0.40
	26-10-2019	25.20	20.70	90.00	80.00	5.80	8.10	4.20	0.40
	27-10-2019	29.20	21.20	90.00	56.00	4.50	8.00	0.00	1.50
	28-10-2019	24.20	29.20	81.00	64.00	3.70	9.15	0.00	2.00
44	29-10-2019	30.20	21.20	84.00	68.00	5.20	7.00	0.00	2.40
	30-10-2019	29.70	19.70	89.00	69.00	5.50	10.20	0.00	2.60
	31-10-2019	31.20	19.70	82.00	78.00	8.60	7.00	2.80	1.80
	01-11-2019	27.30	22.40	82.00	53.00	5.20	2.00	0.00	2.30
	02-11-2019	28.40	19.20	84.00	64.00	1.90	2.20	16.00	2.10
	03-11-2019	28.70	20.20	84.00	71.00	2.40	7.00	0.00	2.90
	04-11-2019	31.20	18.70	84.00	68.00	1.80	8.00	1.80	2.00
45	05-11-2019	30.70	20.20	93.00	75.00	0.60	8.10	3.00	2.00
	06-11-2019	31.20	19.70	92.00	69.00	1.70	6.10	0.00	2.30
	07-11-2019	31.70	18.20	90.00	64.00	2.50	8.45	19.20	1.20
	08-11-2019	29.70	16.20	86.00	56.00	2.70	10.50	0.00	2.30
	09-11-2019	29.70	17.20	95.00	63.00	2.10	10.00	0.00	2.20
	10-11-2019	31.20	15.20	86.00	56.00	1.10	9.20	0.00	2.60
	11-11-2019	30.2	16.7	81.00	66.00	1.50	8.55	0.00	3.00
46	12-11-2019	31.20	17.20	78.00	59.00	2.70	8.30	0.00	2.90
	13-11-2019	30.20	19.20	71.00	64.00	3.20	8.40	0.00	2.30
	14-11-2019	29.20	15.20	73.00	67.00	3.30	8.20	0.00	2.30
	15-11-2019	28.20	17.20	86.00	68.00	2.10	6.20	0.00	2.90
	16-11-2019	30.20	18.70	79.00	67.00	1.30	8.30	0.00	2.60
	17-11-2019	28.20	16.70	75.00	54.00	1.70	8.40	0.00	2.90
	18-11-2019	29.20	17.20	86.00	58.00	1.40	9.20	0.00	3.00
47	19-11-2019	29.20	19.70	78.00	60.00	2.20	9.30	0.00	3.00
	20-11-2019	29.20	17.70	82.00	54.00	3.70	8.40	0.00	3.10
	21-11-2019	29.70	16.70	78.00	73.00	2.60	9.45	0.00	3.40
	22-11-2019	31.20	17.20	78.00	68.00	2.10	8.20	0.00	2.30
	23-11-2019	29.25	16.20	65.00	60.00	2.90	9.40	0.00	3.00
	24-11-2019	30.20	17.20	81.00	60.00	1.50	9.00	0.00	2.60
	25-11-2019	30.20	14.20	80.00	65.00	3.10	9.30	0.00	3.00
48	26-11-2019	23.70	30.20	82.00	52.00	3.40	8.50	0.00	3.10
	27-11-2019	30.20	15.20	63.00	71.00	3.70	9.00	0.00	3.20
	28-11-2019	29.20	17.20	79.00	66.00	2.30	8.50	0.00	3.30
	29-11-2019	30.70	17.20	88.00	66.00	1.60	7.30	0.00	3.60
	30-11-2019	31.20	18.20	86.00	72.00	3.30	7.20	0.00	2.80
	01-12-2019	30.20	17.20	74.00	68.00	2.40	7.30	0.00	3.40
	02-12-2019	30.20	17.20	74.00	65.00	5.60	6.00	0.00	2.70
49	03-12-2019	29.20	18.20	81.00	63.00	6.60	9.05	0.00	2.40
	04-12-2019	28.20	17.70	86.00	76.00	5.80	2.20	0.00	2.30
	05-12-2019	27.20	21.20	79.00	66.00	3.70	0.50	0.00	2.70
	06-12-2019	27.70	17.20	68.00	71.00	2.80	9.10	0.00	3.50
	07-12-2019	29.20	16.20	62.00	60.00	2.00	8.40	0.00	2.90
	08-12-2019	28.20	17.20	78.00	64.00	1.30	8.30	0.00	3.40
	09-12-2019	29.20	14.70	86.00	49.00	2.30	7.10	0.00	2.90
50	10-12-2019	30.20	17.20	86.00	72.00	1.40	7.30	0.00	3.10
	11-12-2019	30.70	15.20	94.00	75.00	1.00	7.25	0.00	3.40
	12-12-2019	30.20	16.20	89.00	74.00	2.30	6.50	0.00	3.10
	13-12-2019	29.20	13.70	81.00	56.00	2.60	8.10	0.00	2.90
	14-12-2019	29.20	13.70	77.00	55.00	1.70	6.55	0.00	3.20
	15-12-2019	29.70	15.20	85.00	56.00	3.40	8.00	0.00	3.20
	16-12-2019	24.20	14.20	86.00	72.00	2.30	6.30	0.00	3.70
51	17-12-2019	28.70	14.20	81.00	56.00	2.20	8.00	0.00	3.40
	18-12-2019	28.20	15.20	89.00	64.00	1.40	8.40	0.00	3.80
	19-12-2019	29.20	14.20	83.00	62.00	2.70	8.00	0.00	3.40
	20-12-2019	28.20	13.70	80.00	61.00	1.20	6.00	0.00	3.40
	21-12-2019	29.20	28.70	85.00	63.00	3.30	4.30	0.00	3.90
	22-12-2019	28.70	18.70	73.00	69.00	3.80	0.20	0.00	2.50
	23-12-2019	27.20	16.70	86.00	61.00	3.40	6.00	0.00	2.80
52	24-12-2019	29.2	17.7	78.00	64.00	1.80	4.50	0.00	2.60
	25-12-2019	29.00	19.20	95.00	67.00	1.10	2.00	5.40	1.20
	26-12-2019	28.20	19.20	36.00	62.00	2.20	2.10	0.00	2.00
	28-12-2019	28.20	15.70	76.00	74.00	3.90	1.40	0.00	1.60
	29-12-2019	25.70	16.20	69.00	54.00	2.10	2.50	0.00	2.00
	30-12-2019	28.20	16.70	69.00	55.00	2.10	7.20	0.00	2.00
	31-12-2019	29.20	12.20	94.00	43.00	3.90	8.50	0.00	1.80
1	01-01-2020	28.20	9.70	56.00	46.00	3.00	9.30	0.00	1.80
	02-01-2020	30.20	10.70	49.00	53.00	4.30	8.25	0.00	2.20
	03-01-2020	28.20	10.20	87.00	66.00	1.50	8.25	0.00	2.60
	04-01-2020	29.20	10.20	80.00	69.00	1.90	5.50	0.00	2.80
	05-01-2020	24.70	11.70	73.00	53.00	3.40	7.30	0.00	2.80
	06-01-2020	26.20	12.20	84.00	72.00	2.90	4.50	0.00	3.00
	07-01-2020	27.20	13.70	88.00	61.00	2.40	4.15	0.00	3.20
2	08-01-2020	29.20	15.20	82.00	60.00	5.00	7.35	0.00	3.20
	09-01-2020	28.20	13.20	94.00	65.00	1.90	7.40	0.00	2.30
	10-01-2020	28.70	12.70	80.00	72.00	1.80	7.50	0.00	2.20
	11-01-2020	27.20	10.70	79.00	66.00	2.50	7.40	0.00	2.70
	12-01-2020	26.70	10.70	85.00	61.00	2.70	8.00	0.00	2.40
	13-01-2020	28.70	12.20	84.00	67.00	3.30	7.25	0.00	2.80
	14-01-2020	26.70	13.70	94.00	57.00	2.40	8.00	0.00	2.90
3	15-01-2020	29.20	13.70	90.00	59.00	3.80	8.20	0.00	2.00
	16-01-2020	28.20	9.20	68.00	55.00	4.40	10.00	0.00	2.70
	17-01-2020	25.20	6.70	75.00	42.00	1.10	10.00	0.00	2.30
	18-01-2020	27.20	9.70	67.00	61.00	2.10	7.40	0.00	2.70
	19-01-2020	29.20	11.70	73.00	57.00	1.30	7.40	0.00	2.20
	20-01-2020	29.70	12.70	84.00	68.00	1.40	8.00	0.00	3.40
	21-01-2020	30.20	15.20	85.00	60.00	1.70	7.50	0.00	3.90
4	22-01-2020	31.20	15.20	87.00	68.00	1.70	10.00	0.00	3.50
	23-01-2020	30.20	16.20	73.00	64.00	3.10	9.00	0.00	3.30
	24-01-2020	30.20	14.20	77.00	60.00	6.10	9.10	0.00	3.40
	25-01-2020	30.70	13.70	81.00	59.00	1.30	9.00	0.00	3.90
	26-01-2020	31.20	15.20	81.00	66.00	1.30	9.30	0.00	3.40
	27-01-2020	32.20	14.70	80.00	57.00	4.70	10.00	0.00	4.00
	28-01-2020	31.20	11.70	77.00	65.00	6.60	9.50	0.00	4.00
5	29-01-2020	26.70	12.20	83.00	63.00	3.80	9.40	0.00	3.20
	30-01-2020	26.20	9.20	78.00	30.00	1.70	9.50	0.00	3.50
	31-01-2020	28.20	10.20	78.00	59.00	2.80	9.40	0.00	3.50
	01-02-2020	30.20	11.70	80.00	47.00	2.10	8.40	0.00	3.20
	02-02-2020	30.70	13.70	7.10	47.00	2.10	8.40	0.00	3.20
	03-02-2020	31.20	13.20	77.00	60.00	3.20	9.30	0.00	2.40
	04-02-2020	28.20	15.20	77.00	60.00	3.20	9.30	0.00	2.40
6	05-02-2020	28.20	12.70	56.00	46.00	2.60	9.40	0.00	3.00
	06-02-2020	29.20	14.20	82.00	60.00	2.30	9.10	0.00	2.60
	07-02-2020	27.20	12.70	79.00	66.00	4.00	10.00	0.00	2.90
	08-02-2020	28.70	14.20	84.00	67.00	4.40	10.00	0.00	3.00
	09-02-2020	29.20	16.20	90.00	59.00	3.70	10.10	0.00	2.40
	10-02-2020	31.20	9.70	86.00	66.00	3.40	6.40	0.00	2.30
	11-02-2020	28.20	16.20	86.00	67.00	3.80	6.10	0.00	2.40
7	12-02-2020	28.70	18.70	75.00	63.00	2.80	3.20	0.00	2.40
	13-02-2020	28.20	17.20	66.00	55.00	0.95	3.10	0.00	2.90
	14-02-2020	27.20	14.70	74.00	59.00	1.30	9.30	0.00	2.90
	15-02-2020	29.70	15.70	52.00	61.00	1.20	8.00	0.00	3.30
	16-02-2020	33.20	17.00	75.00	64.00	2.50	9.30	0.00	3.20
	17-02-2020	32.70	15.20	75.00	61.00	2.60	9.00	0.00	3.10
	18-02-2020	33.20	15.70	81.00	58.00	1.80	9.40	0.00	2.70
8	19-02-2020	33.70	14.70	80.00	56.00	6.90	9.50	0.00	3.90
	20-02-2020	34.20	15.20	80.00	56.00	1.80	9.30	0.00	3.50
	21-02-2020	34.20	14.70	77.00	53.00	2.30	9.05	0.00	3.80
	22-02-2020	33.20	16.20	77.00	58.00	1.70	9.40	0.00	3.50
	23-02-2020	33.70	15.20	71.00	54.00	1.80	9.10	0.00	4.20
	24-02-2020	34.70	15.20	70.00	46.00	3.60	9.10	0.00	4.00
	25-02-2020	34.70	14.20	52.00	75.00	3.00	9.00	0.00	3.20
9	26-02-2020	30.70	11.70	65.00	56.00	2.80	10.10	0.00	3.10
	27-02-2020	33.20	13.20	64.00	46.00	2.40	10.00	0.00	3.00
	28-02-2020	33.20	13.20	76.00	64.00	2.90	9.00	0.00	2.80
	29-02-2020	33.70	14.20	69.00	58.00	3.70	9.55	0.00	2.60
	01-03-2020	32.70	16.20	77.00	60.00	2.70	9.00	0.00	3.20
	02-03-2020	33.70	14.20	71.00	60.00	3.50	8.55	0.00	3.10
	03-03-2020	32.20	12.20	71.00	40.00	5.80	8.45	0.00	3.10
10	05-03-2020	31.20	10.70	71.00	56.00	3.90	8.20	0.00	3.60
	06-03-2020	30.20	12.20	81.00	51.00	3.50	8.20	0.00	3.70
	07-03-2020	31.70	13.20	73.00	53.00	6.50	8.45	0.00	3.70
	08-03-2020	29.20	12.20	77.00	50.00	3.30	9.20	0.00	4.00
	09-03-2020	31.20	14.20	62.00	54.00	3.40	8.50	0.00	4.00
	10-03-2020	33.20	15.20	67.00	50.00	9.30	9.20	0.00	4.40
	11-03-2020	33.40	15.70	55.00	52.00	6.70	8.50	0.00	4.50
11	12-03-2020	30.20	16.20	73.00	56.00	7.20	9.30	0.00	4.20
	13-03-2020	29.70	13.20	69.00	56.00	5.40	9.30	0.00	4.30
	14-03-2020	30.20	11.70	76.00	55.00	2.30	9.00	0.00	3.80
	15-03-2020	3.70	14.20	62.00	54.00	2.60	9.20	0.00	4.60
	16-03-2020	33.70	14.20	77.00	50.00	2.80	9.30	0.00	4.50
	17-03-2020	34.70	11.70	50.00	54.00	3.90	8.05	0.00	4.70
	18-03-2020	35.20	18.20	59.00	50.00	3.70	0.00	0.00	3.00
12	19-03-2020	36.20	17.20	62.00	48.00	5.30	9.10	0.00	4.80
	20-03-2020	37.20	14.20	60.00	43.00	3.70	9.40	0.00	4.30
	21-03-2020	35.70	12.20	55.00	43.00	5.60	9.40	0.00	4.30
	22-03-2020	33.20	11.20	57.00	47.00	1.80	9.20	0.00	4.80
	23-03-2020	36.20	15.20	69.00	48.00	5.60	9.20	0.00	4.50
	24-03-2020	36.70	16.70	71.00	50.00	2.40	9.20	0.00	4.40
	25-03-2020	26.20	18.20	82.00	47.00	2.40	9.10	0.00	4.90
13	26-03-2020	37.20	19.20	62.00	55.00	4.80	8.20	0.00	4.60
	27-03-2020	36.20	18.20	68.00	60.00	2.30	8.30	0.00	4.30
	28-03-2020	35.70	17.20	60.00	68.00	2.60	8.05	0.00	4.80
	29-03-2020	33.20	19.20	76.00	62.00	5.20	8.20	0.00	4.60
	30-03-2020	35.20	19.70	75.00	53.00	2.90	8.00	0.00	4.10
	31-03-2020	36.20	20.20	75.00	62.00	1.70	9.00	0.00	4.70
	01-04-2020	37.70	21.20	72.00	58.00	2.80	9.00	0.00	4.70
14	02-04-2020	38.20	22.70	62.00	55.00	2.50	8.50	12.00	4.70
	03-04-2020	38.20	22.70	72.00	34.00	4.70	9.00	0.00	4.90
	04-04-2020	38.70	22.20	67.00	34.00	3.70	9.00	0.00	4.80
	05-04-2020	39.20	23.20	72.00	49.00	2.80	9.50	0.00	3.60
	06-04-2020	39.70	19.20	68.00	47.00	4.90	9.50	0.00	4.20
	07-04-2020	38.70	21.20	71.00	40.00	3.40	10.00	0.00	3.80
	08-04-2020	38.20	20.20	75.00	60.00	6.90	10.00	0.00	4.80
15	09-04-2020	38.50	21.20	68.00	57.00	1.20	9.50	0.00	4.80
	10-04-2020	38.00	20.20	73.00	54.00	4.30	10.00	0.00	5.00
	11-04-2020	39.20	22.20	73.00	53.00	3.60	10.00	0.00	4.80
	12-04-2020	39.20	21.20	77.00	49.00	1.90	8.10	0.00	4.50
	13-04-2020	38.70	22.20	67.00	39.00	4.20	9.10	0.00	5.00
	14-04-2020	39.20	23.20	65.00	51.00	3.10	9.30	0.00	4.90
	15-04-2020	39.20	21.70	65.00	50.00	3.00	9.00	0.00	5.30
16	16-04-2020	39.70	22.20	73.00	57.00	4.70	8.00	0.00	5.20
	17-04-2020	39.50	24.20	76.00	53.00	4.00	10.30	0.00	5.50
	18-04-2020	39.20	23.70	59.00	53.00	4.10	10.20	0.00	5.10
	19-04-2020	40.20	22.70	66.00	50.00	5.10	9.30	0.00	5.40
	20-04-2020	36.70	18.20	63.00	52.00	4.90	10.20	0.00	4.70
	20-04-2020	39.70	21.20	67.00	52.00	4.10	11.10	0.00	5.40
	21-04-2020	39.2	25.7	49.00	38.00	5.80	11.30	0.00	5.70
	22-04-2020	37.70	16.20	56.00	49.00	3.70	10.35	0.00	4.60
17	23-04-2020	38.20	21.20	52.00	46.00	5.70	11.10	0.00	4.30
	24-04-2020	38.70	19.70	64.00	44.00	6.40	11.25	0.00	5.10
	25-04-2020	38.20	21.20	49.00	9.10	29.00	0.00	0.00	5.80
	26-04-2020	38.70	20.70	74.00	43.00	3.80	11.15	0.00	4.80
	27-04-2020	38.20	19.70	74.00	40.00	5.30	10.50	0.00	5.40
	28-04-2020	38.20	21.20	70.00	46.00	4.30	11.00	0.00	6.10
	29-04-2020	38.70	21.70	71.00	53.00	3.90	11.20	0.00	5.60
18	30-04-2020	39.70	23.70	7.20	46.00	4.80	11.20	0.00	6.30
	01-05-2020	39.20	22.20	74.00	40.00	7.30	11.00	0.00	5.90
	02-05-2020	39.70	21.70	72.00	47.00	6.20	10.10	0.00	4.90
	03-05-2020	40.20	22.20	72.00	44.00	6.00	10.50	0.00	6.20
	04-05-2020	39.20	20.20	62.00	38.00	6.70	11.45	0.00	5.80
	05-05-2020	39.50	18.20	65.00	38.00	5.60	11.10	0.00	4.90
	06-05-2020	40.20	21.20	68.00	30.00	4.60	10.30	0.00	6.10
19	07-05-2020	39.70	19.70	51.00	44.00	6.00	11.10	0.00	5.90
	08-05-2020	40.20	21.20	56.00	40.00	4.80	11.20	0.00	6.00
	09-05-2020	39.70	20.70	71.00	40.00	4.60	11.00	0.00	6.60
	10-05-2020	40.20	22.20	66.00	39.00	6.60	10.20	0.00	6.10
	11-05-2020	40.00	21.70	64.00	52.00	5.20	8.50	0.00	6.60
	12-05-2020	37.20	20.70	59.00	44.00	4.70	10.10	0.00	6.10
	13-05-2020	39.20	21.20	66.00	42.00	5.80	10.30	0.00	5.20
20	14-05-2020	39.70	21.20	61.00	45.00	4.90	7.30	0.00	5.10
	15-05-2020	39.20	19.70	87.00	62.00	2.40	3.05	37.40	4.20
	16-05-2020	34.70	23.70	83.00	58.00	7.90	7.10	0.00	5.30
	17-05-2020	37.20	24.70	81.00	51.00	7.30	4.30	0.00	6.00
	18-05-2020	37.20	23.70	70.00	50.00	9.70	9.50	0.00	6.20
	19-05-2020	35.70	22.70	70.00	60.00	10.00	11.20	0.00	6.30
	20-05-2020	37.20	27.20	55.00	45.00	9.60	11.00	0.00	5.40
21	21-05-2020	37.20	22.20	58.00	49.00	9.70	10.45	0.00	6.20
	22-05-2020	38.20	22.70	74.00	44.00	7.70	11.50	0.00	5.70
	23-05-2020	38.20	19.70	55.00	48.00	10.00	11.00	0.00	5.90
	24-05-2020	39.70	23.70	75.00	48.00	8.20	11.30	0.00	6.10
	25-05-2020	40.40	23.20	78.00	47.00	7.90	11.00	0.00	6.60
	26-05-2020	40.20	23.70	77.00	54.00	8.30	11.55	0.00	5.60
	27-05-2020	37.70	22.70	77.00	53.00	11.40	11.40	0.00	5.90
22	28-05-2020	37.20	21.70	72.00	46.00	13.30	11.45	0.00	5.20
	29-05-2020	36.70	23.70	74.00	56.00	12.20	11.50	0.00	6.10
	30-05-2020	37.20	23.20	75.00	43.00	9.80	11.10	0.00	6.40
	31-05-2020	37.20	24.20	71.00	46.00	5.90	6.25	0.00	6.6
